# Supplementary material for: Muscle-Specific Splicing Factors ASD-2 and SUP-12 Cooperatively Switch Alternative Pre-mRNA Processing Patterns of the ADF/Cofilin Gene in Caenorhabditis elegans
Source: PubMed Central journal article supplement (PMC3469465; doi:10.1371/journal.pgen.1002991), 2012-10-11
Supplement: pgen.1002991.s001.pdf [file pgen.1002991.s001.pdf]

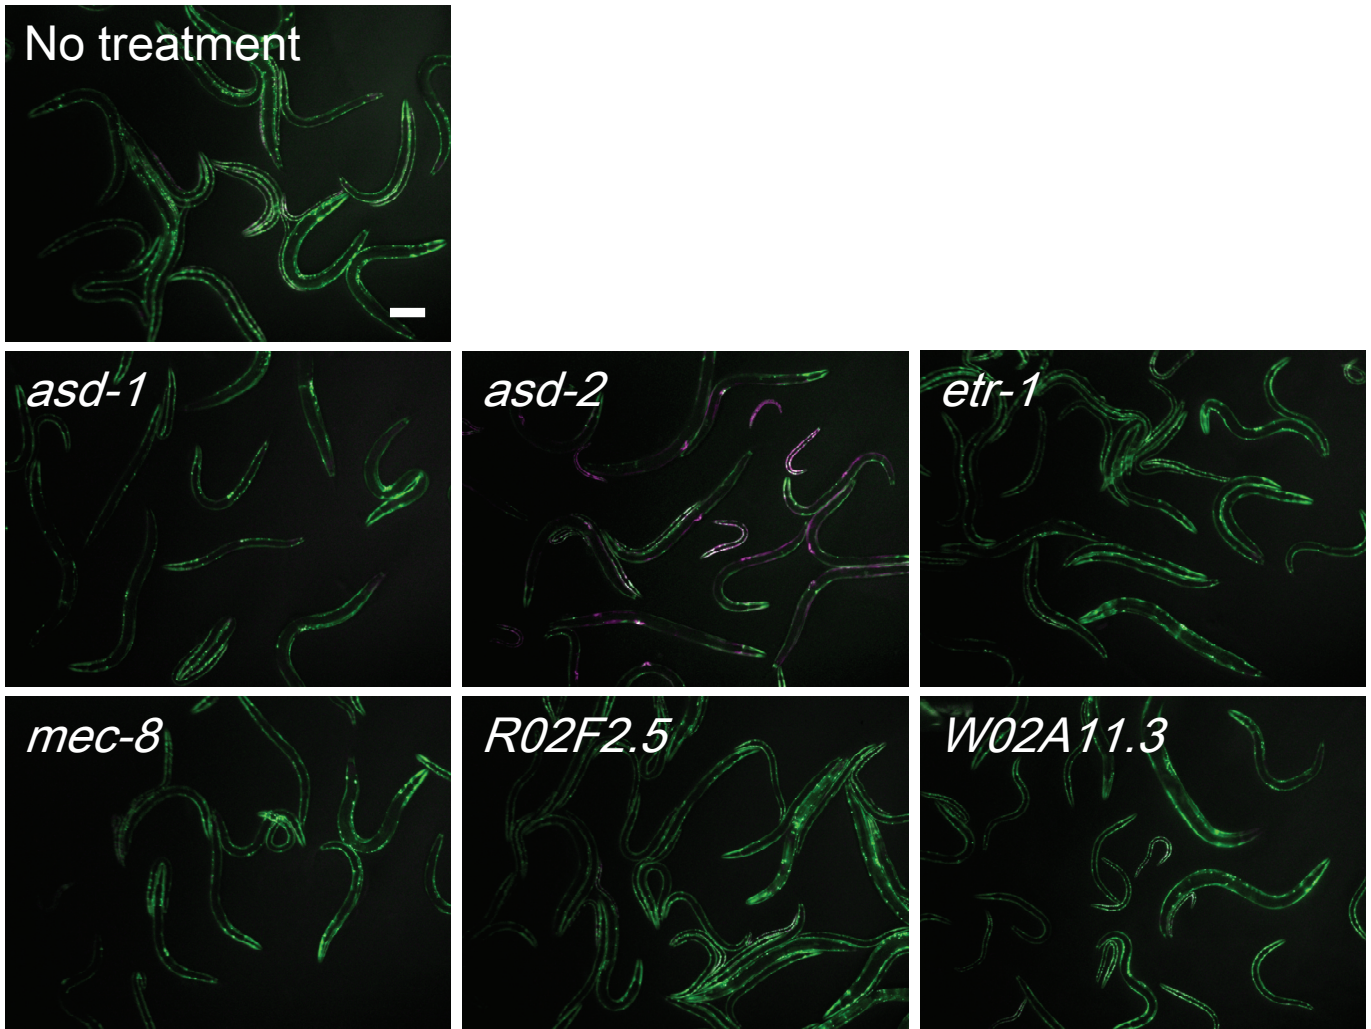

**Figure S1.** RNAi knockdown of SUP-12-interacting proteins revealed ASD-2 as a candidate regulator of the *unc-60* reporter expression. Microphotographs of *ybIs1831* worms fed with bacterial clones expressing dsRNAs for indicated genes. Images in red channels are pseudo-coloured in magenta. Scale bar, 100  $\mu$ m.
