# Supplementary material for: Muscle-Specific Splicing Factors ASD-2 and SUP-12 Cooperatively Switch Alternative Pre-mRNA Processing Patterns of the ADF/Cofilin Gene in Caenorhabditis elegans
Source: PubMed Central journal article supplement (PMC3469465; doi:10.1371/journal.pgen.1002991), 2012-10-11
Supplement: pgen.1002991.s002.pdf [file pgen.1002991.s002.pdf]

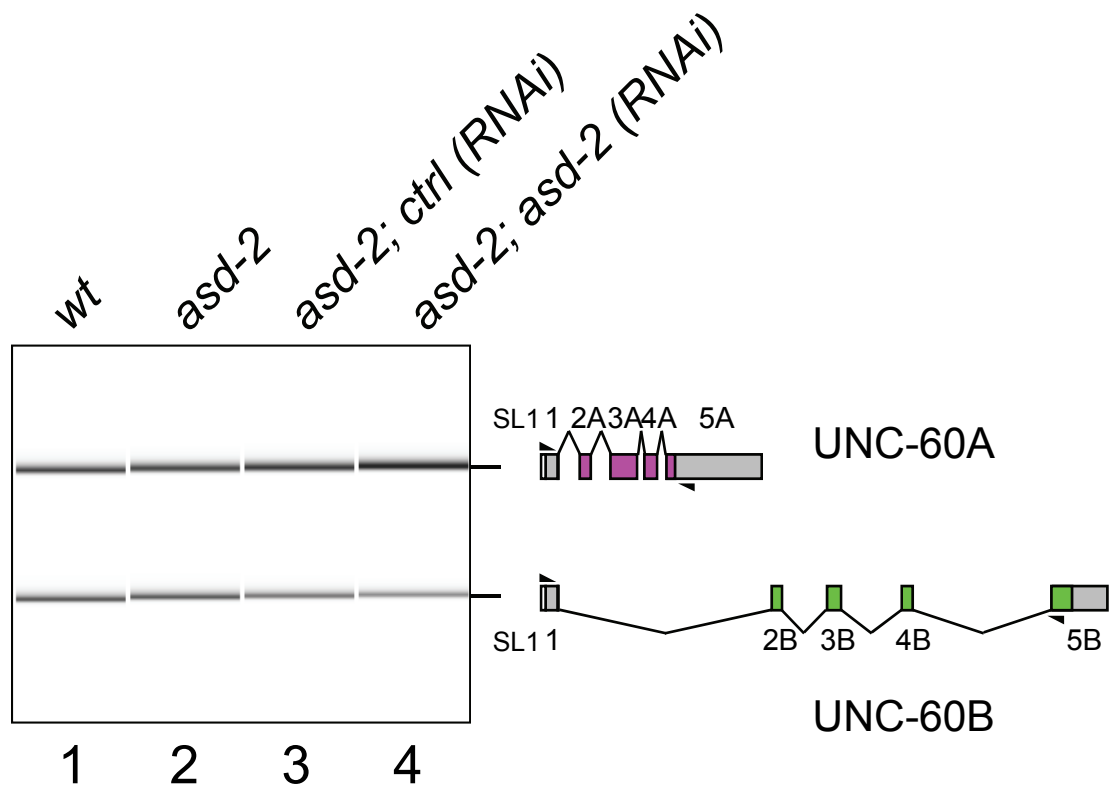

**Figure S2.** RT-PCR analysis of the endogenous *unc-60* mRNAs from synchronized L1 worms of N2 (lane 1), *asd-2* (*yb1540*) (lane 2), *asd-2* (*yb1540*); *ybIs1831*; *control* (*RNAi*) (lane 3) and *asd-2* (*yb1540*); *ybIs1831*; *asd-2* (*RNAi*) (lane 4). Splicing patterns of the mRNAs are schematically shown on the right. Triangles indicate positions and directions of the primers.
