# Supplementary material for: Muscle-Specific Splicing Factors ASD-2 and SUP-12 Cooperatively Switch Alternative Pre-mRNA Processing Patterns of the ADF/Cofilin Gene in Caenorhabditis elegans
Source: PubMed Central journal article supplement (PMC3469465; doi:10.1371/journal.pgen.1002991), 2012-10-11
Supplement: pgen.1002991.s003.pdf [file pgen.1002991.s003.pdf]

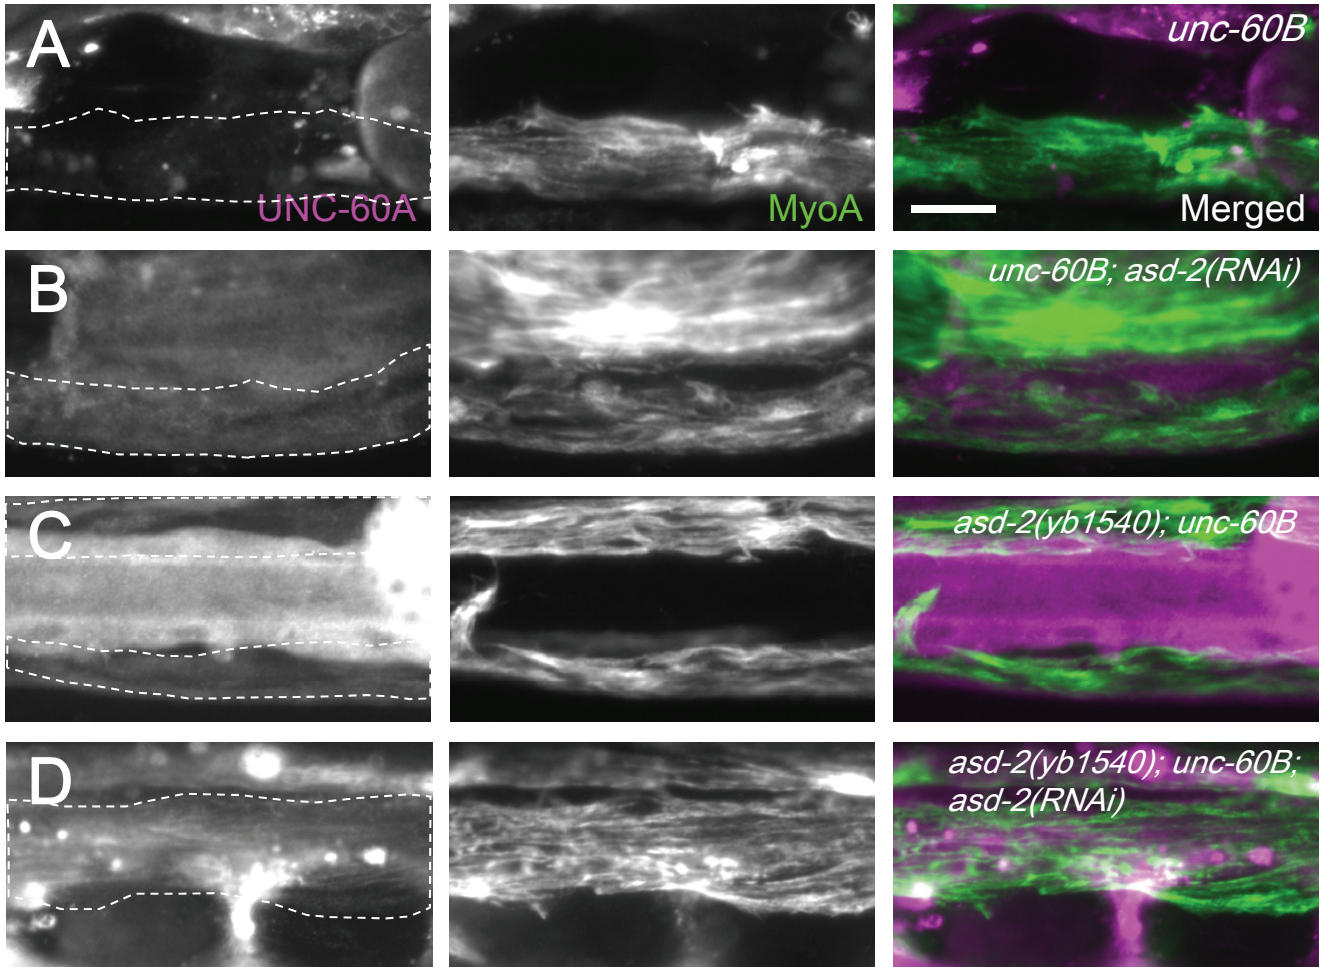

**Figure S3.** Immunofluorescence images of UNC-60A (left) and MyoA (middle) and merged images (right) of *unc-60 (su158)* (**A**), *unc-60 (su158); asd-2 (RNAi)* (**B**), *asd-2 (yb1540); unc-60 (su158)* (**C**) and *asd-2 (yb1540); unc-60 (su158); asd-2 (RNAi)* (**D**) worms. MyoA is a marker for body wall muscles (encircled with dotted lines in left panels). Scale bar, 20  $\mu$ m.
